# Supplementary material for: Diurnal Temperature Range in Relation to Daily Mortality and Years of Life Lost in Wuhan, China
Source: MDPI journal article supplement (doi:10.3390/ijerph14080891), 2017-08-08
Supplement: s1 [file s1]

# Supplementary Material

Table S1. Age-specific life expectancy for Chinese females and males for the year 2012.

| Age Group (years) | Female | Male |
|-------------------|--------|------|
| <1                | 77.0   | 73.9 |
| 1-4               | 76.8   | 73.8 |
| 5-9               | 73.0   | 70.0 |
| 10-14             | 68.1   | 65.1 |
| 15-19             | 63.2   | 60.2 |
| 20-24             | 58.3   | 55.3 |
| 25-29             | 53.4   | 50.5 |
| 30-34             | 48.5   | 45.7 |
| 35-39             | 43.7   | 40.9 |
| 40-44             | 38.9   | 36.2 |
| 45-49             | 34.2   | 31.5 |
| 50-54             | 29.5   | 26.9 |
| 55-59             | 24.9   | 22.5 |
| 60-64             | 20.6   | 18.3 |
| 65-69             | 16.6   | 14.5 |
| 70-74             | 13.0   | 11.2 |
| 75-79             | 9.9    | 8.6  |
| 80-84             | 7.4    | 6.6  |
| 85-89             | 5.4    | 4.9  |
| 90-94             | 4.1    | 3.7  |
| 95-99             | 3.2    | 2.9  |
| 100+              | 2.8    | 2.3  |

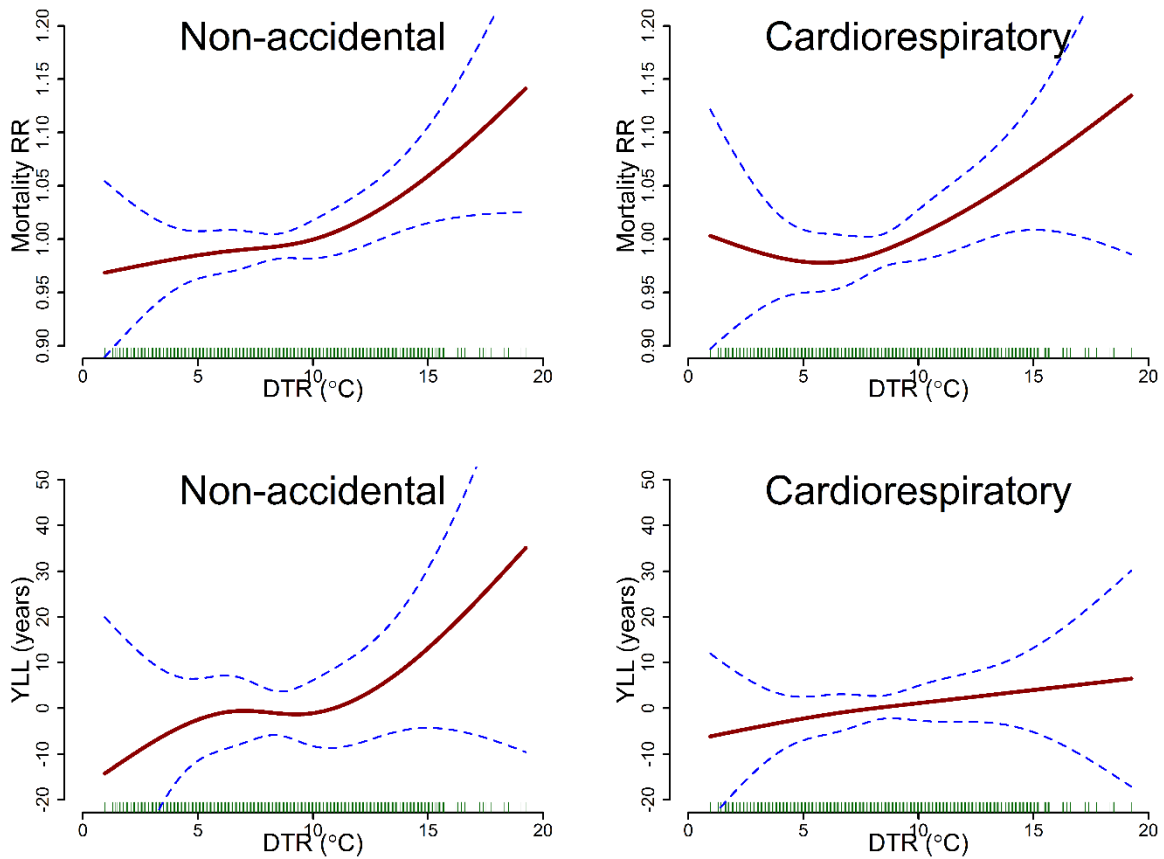

**Figure S1.** Dose-response relationships of DTR at lag 0–1 days (smoothing by a natural cubic spline with  $df = 3$ ) with daily mortality and YLL due to non-accidental and cardiorespiratory deaths in Wuhan, China, 2009–2012. The continuous bold red lines represent the effect estimates and long-dashed blue lines are the 95% confidence intervals.

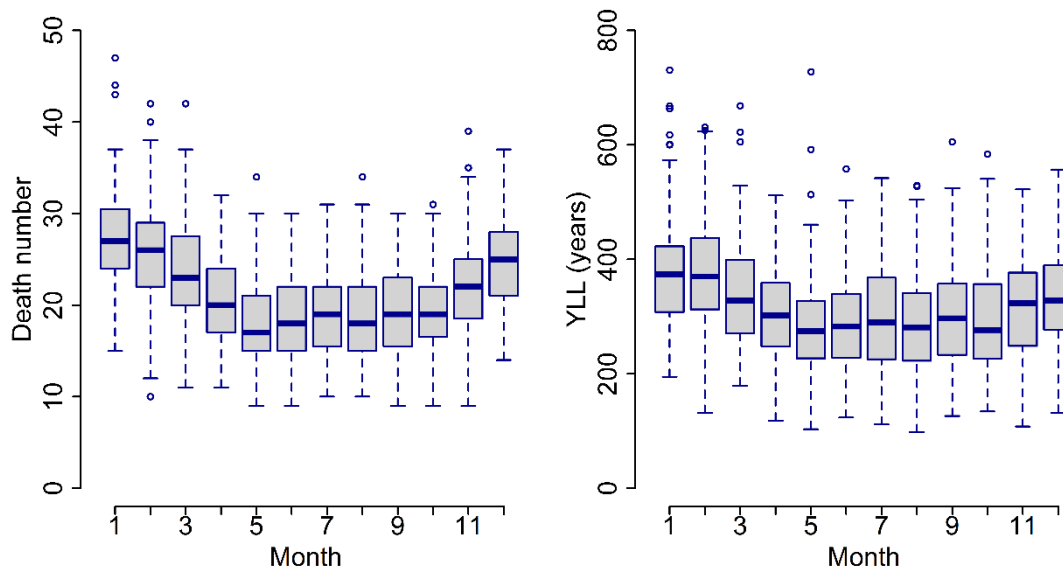

**Figure S2.** Boxplots for monthly death number and YLL due to non-accidental mortality in Wuhan, China, 2009–2012.

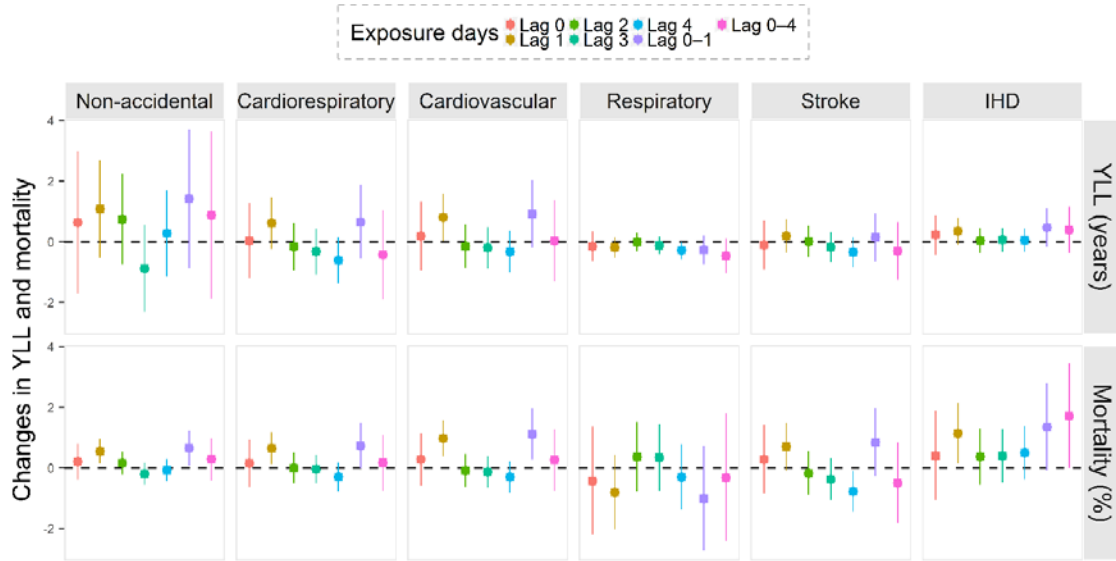

**Figure S3.** The estimated effects of DTR on cause-specific mortality and YLL at different lag days. The results were presented as changes in daily mortality (%) and YLL (years) associated with a 1 °C increase in DTR.

**Table S2.** Sensitivity analyses for DTR-associated effects on YLL and mortality among females, by changing  $df$  (4–6 per year) in the smoothness of calendar time and  $df$  (4–6) of natural cubic spline for mean humidity, mean wind speed, sunshine duration, and atmospheric pressure.

| Variables            | Mortality (%)     |                   | YLL (years)        |                   |
|----------------------|-------------------|-------------------|--------------------|-------------------|
|                      | Non-accidental    | Cardiovascular    | Non-accidental     | Cardiovascular    |
| Calendar time        |                   |                   |                    |                   |
| $df = 4/\text{year}$ | 1.26 (0.44, 2.09) | 1.68 (0.54, 2.83) | 1.51 (0.19, 2.84)  | 0.86 (0.22, 1.50) |
| $df = 5/\text{year}$ | 1.17 (0.34, 2.00) | 1.64 (0.49, 2.79) | 1.32 (-0.01, 2.66) | 0.86 (0.21, 1.50) |
| $df = 6/\text{year}$ | 1.19 (0.35, 2.03) | 1.70 (0.53, 2.87) | 1.37 (0.02, 2.72)  | 0.88 (0.23, 1.54) |
| Mean humidity        |                   |                   |                    |                   |
| $df = 4$             | 1.24 (0.40, 2.09) | 1.72 (0.54, 2.90) | 1.44 (0.08, 2.80)  | 0.89 (0.23, 1.55) |
| $df = 5$             | 1.25 (0.40, 2.09) | 1.73 (0.55, 2.91) | 1.44 (0.08, 2.80)  | 0.90 (0.23, 1.56) |
| $df = 6$             | 1.25 (0.41, 2.10) | 1.74 (0.56, 2.92) | 1.46 (0.10, 2.82)  | 0.90 (0.24, 1.56) |
| Mean wind speed      |                   |                   |                    |                   |
| $df = 4$             | 1.30 (0.46, 2.15) | 1.77 (0.59, 2.96) | 1.57 (0.21, 2.93)  | 0.92 (0.26, 1.58) |
| $df = 5$             | 1.29 (0.44, 2.14) | 1.85 (0.67, 3.04) | 1.52 (0.16, 2.88)  | 0.95 (0.28, 1.61) |
| $df = 6$             | 1.30 (0.46, 2.15) | 1.85 (0.67, 3.04) | 1.54 (0.18, 2.90)  | 0.94 (0.28, 1.61) |
| Sunshine duration    |                   |                   |                    |                   |
| $df = 4$             | 1.26 (0.42, 2.11) | 1.74 (0.57, 2.93) | 1.42 (0.06, 2.78)  | 0.89 (0.23, 1.55) |
| $df = 5$             | 1.27 (0.43, 2.12) | 1.72 (0.54, 2.90) | 1.42 (0.06, 2.78)  | 0.87 (0.21, 1.53) |
| $df = 6$             | 1.28 (0.44, 2.13) | 1.72 (0.55, 2.91) | 1.44 (0.08, 2.80)  | 0.88 (0.22, 1.54) |
| Atmospheric pressure |                   |                   |                    |                   |
| $df = 4$             | 1.27 (0.44, 2.12) | 1.74 (0.56, 2.92) | 1.48 (0.12, 2.84)  | 0.90 (0.24, 1.56) |
| $df = 5$             | 1.29 (0.45, 2.14) | 1.77 (0.59, 2.96) | 1.55 (0.19, 2.91)  | 0.93 (0.26, 1.59) |
| $df = 6$             | 1.30 (0.45, 2.14) | 1.75 (0.57, 2.93) | 1.56 (0.20, 2.92)  | 0.93 (0.27, 1.60) |

**Table S3.** Sensitivity analyses for DTR-associated effects on YLL and mortality among the elderly (75+ years old), by changing *df* (4–6 per year) in the smoothness of calendar time and *df* (4–6) of natural cubic spline for mean humidity, mean wind speed, sunshine duration, and atmospheric pressure.

| Variables            | Mortality (%)      |                   | YLL (years)       |                   |
|----------------------|--------------------|-------------------|-------------------|-------------------|
|                      | Non-accidental     | Cardiovascular    | Non-accidental    | Cardiovascular    |
| Calendar time        |                    |                   |                   |                   |
| <i>df</i> = 4/year   | 0.72 (0.00, 1.44)  | 1.25 (0.26, 2.25) | 0.72 (0.07, 1.37) | 0.63 (0.18, 1.09) |
| <i>df</i> = 5/year   | 0.64 (-0.09, 1.37) | 1.19 (0.19, 2.20) | 0.65 (0.00, 1.31) | 0.61 (0.15, 1.06) |
| <i>df</i> = 6/year   | 0.68 (-0.06, 1.42) | 1.20 (0.19, 2.23) | 0.70 (0.04, 1.36) | 0.60 (0.14, 1.07) |
| Mean humidity        |                    |                   |                   |                   |
| <i>df</i> = 4        | 0.70 (-0.04, 1.44) | 1.20 (0.18, 2.23) | 0.71 (0.04, 1.37) | 0.59 (0.12, 1.06) |
| <i>df</i> = 5        | 0.70 (-0.03, 1.45) | 1.21 (0.19, 2.24) | 0.72 (0.05, 1.39) | 0.60 (0.13, 1.06) |
| <i>df</i> = 6        | 0.70 (-0.04, 1.45) | 1.22 (0.20, 2.25) | 0.72 (0.05, 1.39) | 0.60 (0.13, 1.07) |
| Mean wind speed      |                    |                   |                   |                   |
| <i>df</i> = 4        | 0.73 (-0.01, 1.48) | 1.24 (0.21, 2.27) | 0.73 (0.06, 1.40) | 0.60 (0.14, 1.07) |
| <i>df</i> = 5        | 0.76 (0.02, 1.51)  | 1.30 (0.27, 2.34) | 0.76 (0.09, 1.43) | 0.63 (0.16, 1.10) |
| <i>df</i> = 6        | 0.77 (0.03, 1.52)  | 1.30 (0.28, 2.34) | 0.77 (0.10, 1.44) | 0.63 (0.17, 1.10) |
| Sunshine duration    |                    |                   |                   |                   |
| <i>df</i> = 4        | 0.71 (-0.03, 1.46) | 1.23 (0.21, 2.26) | 0.72 (0.05, 1.38) | 0.60 (0.14, 1.07) |
| <i>df</i> = 5        | 0.72 (-0.02, 1.47) | 1.20 (0.18, 2.23) | 0.73 (0.06, 1.40) | 0.59 (0.12, 1.06) |
| <i>df</i> = 6        | 0.72 (-0.02, 1.47) | 1.20 (0.18, 2.23) | 0.73 (0.06, 1.40) | 0.59 (0.12, 1.06) |
| Atmospheric pressure |                    |                   |                   |                   |
| <i>df</i> = 4        | 0.73 (0.00, 1.48)  | 1.23 (0.21, 2.26) | 0.74 (0.08, 1.41) | 0.61 (0.14, 1.07) |
| <i>df</i> = 5        | 0.73 (-0.01, 1.47) | 1.22 (0.20, 2.25) | 0.74 (0.07, 1.41) | 0.61 (0.14, 1.07) |
| <i>df</i> = 6        | 0.73 (-0.01, 1.48) | 1.21 (0.19, 2.25) | 0.74 (0.07, 1.41) | 0.60 (0.13, 1.07) |

**Table S4.** Yearly summary distributions of daily death number and YLL during 2009–2012.

| Year      | Daily Deaths |     |       | Daily YLL (years) |       |             |
|-----------|--------------|-----|-------|-------------------|-------|-------------|
|           | Mean         | SD  | Range | Mean              | SD    | Range       |
| 2009      | 21.3         | 5.9 | 9–44  | 330.1             | 95.6  | 97.9–730.8  |
| 2010      | 21.3         | 5.9 | 10–43 | 320.0             | 97.1  | 132.2–668.4 |
| 2011      | 21.5         | 6.0 | 9–47  | 315.6             | 103.0 | 103.1–727.6 |
| 2012      | 21.5         | 5.8 | 9–39  | 305.4             | 91.7  | 126.1–667.8 |
| 2009–2012 | 21.4         | 5.9 | 9–47  | 317.8             | 97.2  | 97.9–730.8  |
